# Supplementary material for: Is Bilirubin Associated with the Severity of Ischemic Stroke? A Dose Response Meta-Analysis
Source: MDPI journal article supplement (doi:10.3390/jcm11123262), 2022-06-07
Supplement: s1 [file s1]

---

|                     |                                                                           |
|---------------------|---------------------------------------------------------------------------|
| Supplement Table S1 | <b>PRISMA checklist.</b>                                                  |
| Supplement Table S2 | <b>Strategies for the database search</b>                                 |
| Supplement Table S3 | <b>Quality evaluation of included studies</b>                             |
| Supplement Table S4 | <b>Characteristics of included studies</b>                                |
| Supplement Table S5 | <b>Sensitivity analysis on the pooled ORs of ischemic stroke severity</b> |
| Supplement Table S6 | <b>Effect estimates corresponding to each dose point</b>                  |

---

**Table S1.** PRISMA checklist.

| Section and Topic    | Item # | Checklist item                                                                                                                                                                                                                                                                   | Location where item is reported |
|----------------------|--------|----------------------------------------------------------------------------------------------------------------------------------------------------------------------------------------------------------------------------------------------------------------------------------|---------------------------------|
| <b>TITLE</b>         |        |                                                                                                                                                                                                                                                                                  |                                 |
| Title                | 1      | Identify the report as a systematic review.                                                                                                                                                                                                                                      | Title                           |
| <b>ABSTRACT</b>      |        |                                                                                                                                                                                                                                                                                  |                                 |
| Abstract             | 2      | See the PRISMA 2020 for Abstracts checklist.                                                                                                                                                                                                                                     | Supplement Table S1             |
| <b>INTRODUCTION</b>  |        |                                                                                                                                                                                                                                                                                  |                                 |
| Rationale            | 3      | Describe the rationale for the review in the context of existing knowledge.                                                                                                                                                                                                      | Line 17-29                      |
| Objectives           | 4      | Provide an explicit statement of the objective(s) or question(s) the review addresses.                                                                                                                                                                                           | Line 29-33                      |
| <b>METHODS</b>       |        |                                                                                                                                                                                                                                                                                  |                                 |
| Eligibility criteria | 5      | Specify the inclusion and exclusion criteria for the review and how studies were grouped for the syntheses.                                                                                                                                                                      | Line 49-53                      |
| Information sources  | 6      | Specify all databases, registers, websites, organisations, reference lists and other sources searched or consulted to identify studies. Specify the date when each source was last searched or consulted.                                                                        | Line 53-55                      |
| Search strategy      | 7      | Present the full search strategies for all databases, registers and websites, including any filters and limits used.                                                                                                                                                             | Supplementary Table S2          |
| Selection process    | 8      | Specify the methods used to decide whether a study met the inclusion criteria of the review, including how many reviewers screened each record and each report retrieved, whether they worked independently, and if applicable, details of automation tools used in the process. | Line 43-50                      |
| Data collection      | 9      | Specify the methods used to collect data from reports, including how many reviewers collected data from each report,                                                                                                                                                             | Line 57-58                      |

| Section and Topic             | Item # | Checklist item                                                                                                                                                                                                                                                                | Location where item is reported |
|-------------------------------|--------|-------------------------------------------------------------------------------------------------------------------------------------------------------------------------------------------------------------------------------------------------------------------------------|---------------------------------|
| process                       |        | whether they worked independently, any processes for obtaining or confirming data from study investigators, and if applicable, details of automation tools used in the process.                                                                                               |                                 |
| Data items                    | 10a    | List and define all outcomes for which data were sought. Specify whether all results that were compatible with each outcome domain in each study were sought (e.g. for all measures, time points, analyses), and if not, the methods used to decide which results to collect. | Line 59-66                      |
|                               | 10b    | List and define all other variables for which data were sought (e.g. participant and intervention characteristics, funding sources). Describe any assumptions made about any missing or unclear information.                                                                  | Line 67-70                      |
| Study risk of bias assessment | 11     | Specify the methods used to assess risk of bias in the included studies, including details of the tool(s) used, how many reviewers assessed each study and whether they worked independently, and if applicable, details of automation tools used in the process.             | Line 64-66                      |
| Effect measures               | 12     | Specify for each outcome the effect measure(s) (e.g. risk ratio, mean difference) used in the synthesis or presentation of results.                                                                                                                                           | Line 90-92                      |
| Synthesis methods             | 13a    | Describe the processes used to decide which studies were eligible for each synthesis (e.g. tabulating the study intervention characteristics and comparing against the planned groups for each synthesis (item #5)).                                                          | Line 93-95                      |
|                               | 13b    | Describe any methods required to prepare the data for presentation or synthesis, such as handling of missing summary statistics, or data conversions.                                                                                                                         | Line 96-100                     |
|                               | 13c    | Describe any methods used to tabulate or visually display results of individual studies and syntheses.                                                                                                                                                                        | Line 103-105                    |
|                               | 13d    | Describe any methods used to synthesize results and provide a rationale for the choice(s). If meta-analysis was performed, describe the model(s), method(s) to identify the presence and extent of statistical heterogeneity, and software package(s) used.                   | Line 105-106                    |

| Section and Topic             | Item # | Checklist item                                                                                                                                                                                                                   | Location where item is reported |
|-------------------------------|--------|----------------------------------------------------------------------------------------------------------------------------------------------------------------------------------------------------------------------------------|---------------------------------|
|                               | 13e    | Describe any methods used to explore possible causes of heterogeneity among study results (e.g. subgroup analysis, meta-regression).                                                                                             | Line 109-110                    |
|                               | 13f    | Describe any sensitivity analyses conducted to assess robustness of the synthesized results.                                                                                                                                     | Line 109-110                    |
| Reporting bias assessment     | 14     | Describe any methods used to assess risk of bias due to missing results in a synthesis (arising from reporting biases).                                                                                                          | Line 110-112                    |
| Certainty assessment          | 15     | Describe any methods used to assess certainty (or confidence) in the body of evidence for an outcome.                                                                                                                            | Line 112-113                    |
| <b>RESULTS</b>                |        |                                                                                                                                                                                                                                  |                                 |
| Study selection               | 16a    | Describe the results of the search and selection process, from the number of records identified in the search to the number of studies included in the review, ideally using a flow diagram.                                     | Figure1                         |
|                               | 16b    | Cite studies that might appear to meet the inclusion criteria, but which were excluded, and explain why they were excluded.                                                                                                      | Line27-134                      |
| Study characteristics         | 17     | Cite each included study and present its characteristics.                                                                                                                                                                        | Table1                          |
| Risk of bias in studies       | 18     | Present assessments of risk of bias for each included study.                                                                                                                                                                     | Supplementary Table S3          |
| Results of individual studies | 19     | For all outcomes, present, for each study: (a) summary statistics for each group (where appropriate) and (b) an effect estimate and its precision (e.g. confidence/credible interval), ideally using structured tables or plots. | Figure 2,3                      |
| Results of syntheses          | 20a    | For each synthesis, briefly summarise the characteristics and risk of bias among contributing studies.                                                                                                                           | Supplemnt Table S3              |

| Section and Topic         | Item # | Checklist item                                                                                                                                                                                                                                                                       | Location where item is reported |
|---------------------------|--------|--------------------------------------------------------------------------------------------------------------------------------------------------------------------------------------------------------------------------------------------------------------------------------------|---------------------------------|
|                           | 20b    | Present results of all statistical syntheses conducted. If meta-analysis was done, present for each the summary estimate and its precision (e.g. confidence/credible interval) and measures of statistical heterogeneity. If comparing groups, describe the direction of the effect. | Line 148-182                    |
|                           | 20c    | Present results of all investigations of possible causes of heterogeneity among study results.                                                                                                                                                                                       | Table 2                         |
|                           | 20d    | Present results of all sensitivity analyses conducted to assess the robustness of the synthesized results.                                                                                                                                                                           | Supplement Table S5             |
| Reporting biases          | 21     | Present assessments of risk of bias due to missing results (arising from reporting biases) for each synthesis assessed.                                                                                                                                                              | Line 173-178                    |
| Certainty of evidence     | 22     | Present assessments of certainty (or confidence) in the body of evidence for each outcome assessed.                                                                                                                                                                                  | Line 183-193                    |
| <b>DISCUSSION</b>         |        |                                                                                                                                                                                                                                                                                      |                                 |
| Discussion                | 23a    | Provide a general interpretation of the results in the context of other evidence.                                                                                                                                                                                                    | Line 195-249                    |
|                           | 23b    | Discuss any limitations of the evidence included in the review.                                                                                                                                                                                                                      | Line 256-259                    |
|                           | 23c    | Discuss any limitations of the review processes used.                                                                                                                                                                                                                                | Line 259-262                    |
|                           | 23d    | Discuss implications of the results for practice, policy, and future research.                                                                                                                                                                                                       | Line 263-268                    |
| <b>OTHER INFORMATION</b>  |        |                                                                                                                                                                                                                                                                                      |                                 |
| Registration and protocol | 24a    | Provide registration information for the review, including register name and registration number, or state that the review was not registered.                                                                                                                                       | N/A                             |
|                           | 24b    | Indicate where the review protocol can be accessed, or state that a protocol was not prepared.                                                                                                                                                                                       | N/A                             |

| Section and Topic                              | Item # | Checklist item                                                                                                                                                                                                                             | Location where item is reported |
|------------------------------------------------|--------|--------------------------------------------------------------------------------------------------------------------------------------------------------------------------------------------------------------------------------------------|---------------------------------|
|                                                | 24c    | Describe and explain any amendments to information provided at registration or in the protocol.                                                                                                                                            | N/A                             |
| Support                                        | 25     | Describe sources of financial or non-financial support for the review, and the role of the funders or sponsors in the review.                                                                                                              | N/A                             |
| Competing interests                            | 26     | Declare any competing interests of review authors.                                                                                                                                                                                         | Line 275-276                    |
| Availability of data, code and other materials | 27     | Report which of the following are publicly available and where they can be found: template data collection forms; data extracted from included studies; data used for all analyses; analytic code; any other materials used in the review. | N/A                             |

**Table S2.** Strategies for the database search.

| Search number | Query                                                                                                                                                                                                                                                                                                                                                                                                                                                                                                                                                                                                                                                                                                                                                                                                                                                                                                                                                                                                                                                                                                                                                                                                                                                                                           |
|---------------|-------------------------------------------------------------------------------------------------------------------------------------------------------------------------------------------------------------------------------------------------------------------------------------------------------------------------------------------------------------------------------------------------------------------------------------------------------------------------------------------------------------------------------------------------------------------------------------------------------------------------------------------------------------------------------------------------------------------------------------------------------------------------------------------------------------------------------------------------------------------------------------------------------------------------------------------------------------------------------------------------------------------------------------------------------------------------------------------------------------------------------------------------------------------------------------------------------------------------------------------------------------------------------------------------|
| 4             | #8 and #9 and #10                                                                                                                                                                                                                                                                                                                                                                                                                                                                                                                                                                                                                                                                                                                                                                                                                                                                                                                                                                                                                                                                                                                                                                                                                                                                               |
| 3             | ((National Institutes of Health Stroke Scale) OR (severity)) OR (NIHSS)                                                                                                                                                                                                                                                                                                                                                                                                                                                                                                                                                                                                                                                                                                                                                                                                                                                                                                                                                                                                                                                                                                                                                                                                                         |
| 2             | <p>((((((((((((((((("Bilirubin"[Mesh]) OR (Bilirubin IX alpha)) OR (Bilirubin, (4E)-Isomer)) OR (Bilirubin, (4E,15E)-Isomer)) OR (Hematoidin)) OR (Bilirubin, Disodium Salt)) OR (Disodium Salt Bilirubin)) OR (Bilirubin, Monosodium Salt)) OR (Monosodium Salt Bilirubin)) OR (delta-Bilirubin)) OR (Bilirubin, (15E)-Isomer)) OR (delta Bilirubin)) OR (Bilirubin, (15E)-Isomer)) OR (Bilirubin, Calcium Salt)) OR (Calcium Salt Bilirubin)) OR (Salt Bilirubin, Calcium)) OR (Calcium Bilirubinate)) OR (Bilirubinate, Calcium)</p> <p>((((((((((((((((("Ischemic Stroke"[MeSH Terms] ) OR (Ischemic Strokes)) OR (Stroke, Ischemic)) OR (Ischaemic Stroke)) OR (Ischaemic Strokes)) OR (Stroke, Ischaemic)) OR (Cryptogenic Ischemic Stroke)) OR (Cryptogenic Ischemic Strokes)) OR (Ischemic Stroke, Cryptogenic)) OR (Stroke, Cryptogenic Ischemic)) OR (Cryptogenic Stroke)) OR (Cryptogenic Strokes)) OR (Stroke, Cryptogenic)) OR (Cryptogenic Embolism Stroke)) OR (Cryptogenic Embolism Strokes)) OR (Embolism Stroke, Cryptogenic)) OR (Stroke, Cryptogenic Embolism)) OR (Wake-up Stroke)) OR (Stroke, Wake-up)) OR (Wake up Stroke)) OR (Wake-up Strokes)) OR (Acute Ischemic Stroke)) OR (Acute Ischemic Strokes)) OR (Ischemic Stroke, Acute)) OR (Stroke, Acute Ischemic)</p> |
| 1             |                                                                                                                                                                                                                                                                                                                                                                                                                                                                                                                                                                                                                                                                                                                                                                                                                                                                                                                                                                                                                                                                                                                                                                                                                                                                                                 |

**Table S3.** Quality evaluation of included studies.

| Selection          |                                          |                                     |                           |                                                                          | Comparability                                                              |                           | Outcome                                             |                                  | Final score |
|--------------------|------------------------------------------|-------------------------------------|---------------------------|--------------------------------------------------------------------------|----------------------------------------------------------------------------|---------------------------|-----------------------------------------------------|----------------------------------|-------------|
| Cohort studies     |                                          |                                     |                           |                                                                          |                                                                            |                           |                                                     |                                  |             |
| Authors            | Representativeness of the exposed cohort | Selection of the non-exposed cohort | Ascertainment of exposure | Demonstration that outcome of interest was not present at start of study | Comparability of cohorts on the basis of the design or analysis            | Assessment of outcome     | Was follow-up long enough for outcomes to occur     | Adequacy of follow up of cohorts |             |
| Li, Z.             | 1                                        | 1                                   | 1                         | 1                                                                        | 2                                                                          | 1                         | 1                                                   | 1                                | 9           |
| Luo, Y.            | 1                                        | 1                                   | 1                         | 1                                                                        | 2                                                                          | 1                         | 1                                                   | 1                                | 9           |
| Pineda, S          | 1                                        | 1                                   | 1                         | 1                                                                        | 2                                                                          | 1                         | 1                                                   | 1                                | 9           |
| Case-control study |                                          |                                     |                           |                                                                          |                                                                            |                           |                                                     |                                  |             |
| Authors            | Is the case definition adequate?         | Representativeness of the cases     | Selection of Controls     | Definition of Controls                                                   | Comparability of cases and controls on the basis of the design or analysis | Ascertainment of exposure | Same method of ascertainment for cases and controls | Non-Response rate                | Final score |
| Chen Guodong       | 1                                        | 1                                   | 1                         | 0                                                                        | 2                                                                          | 1                         | 0                                                   | 1                                | 7           |



|                       |                                 |                 |                                 |                           |                                                      |                                                                                                                       |                       |                  |             |
|-----------------------|---------------------------------|-----------------|---------------------------------|---------------------------|------------------------------------------------------|-----------------------------------------------------------------------------------------------------------------------|-----------------------|------------------|-------------|
| Yan Wang              | 1                               | 1               | 1                               | 1                         | 2                                                    | 1                                                                                                                     | 1                     | 1                | 9           |
| Ye Shan               | 1                               | 1               | 1                               | 1                         | 2                                                    | 1                                                                                                                     | 1                     | 1                | 9           |
| Cross-sectional study |                                 |                 |                                 |                           |                                                      |                                                                                                                       |                       |                  |             |
| Authors               | Representativeness of the cases | Non-respondents | Adequate definition of exposure | Ascertainment of exposure | Comparability on the basis of the design or analysis | The study used a precise definition of outcome and valid and reliable method (individually for each relevant outcome) | Assessment of outcome | Statistical test | Final score |
| Xu, T                 | 1                               | 1               | 1                               | 1                         | 2                                                    | Unscored                                                                                                              | 1                     | 1                | 8           |

**Table S4** .Characteristics of included studies.

| Study ID  | Year | Area  | Study design | Source of population | Total number | Outcome         | Bilirubin collection time           | Bilirubin types | Bilirubin (μmol/L)                                | Distribution of bilirubin (μmol/L) | Included                                                                                                                   | Excluded                                                                                                                                                                              | Adjustment                                                                                                                                                                                                           |
|-----------|------|-------|--------------|----------------------|--------------|-----------------|-------------------------------------|-----------------|---------------------------------------------------|------------------------------------|----------------------------------------------------------------------------------------------------------------------------|---------------------------------------------------------------------------------------------------------------------------------------------------------------------------------------|----------------------------------------------------------------------------------------------------------------------------------------------------------------------------------------------------------------------|
| Pineda, S | 2008 | USA   | Cohort       | Hospital-based       | 743          | Stroke severity | After stroke: 24 hours of admission | DBIL            | N/A                                               | quartiles                          | admission for acute ischemic stroke; bilirubin levels obtained on admission; and no established history of hepatic disease | N/A                                                                                                                                                                                   | age, sex, history of atrial fibrillation, history of hypertension, hyperlipidemia, diabetes, smoking status, admission glucose, premorbid antithrombotic use, premorbid statin use, and premorbid functional status. |
| Luo, Y.   | 2012 | China | Cohort       | Hospital-based       | 531          | Stroke severity | After stroke: on hospital admission | TBIL<br>DBIL    | TBIL: 18.54±0.40 μmol/L<br>DBIL: 4.70±0.10 μmol/L | quartiles                          | At admission, plain CT scan of the head was done to rule out haemorrhage and MRI was done to                               | Without CT of the head; Without MRI of the head; Admitted more than 7 days after the onset of symptoms; Pre-stroke impairment; Coexistence with infections diseases; Coexistence with | blood glucose (BG), uric acid (UA), Triglyceride (TG), cholesterol(TC), High density lipoprotein cholesterol (HDL-C), Low                                                                                            |

|        |      |       |                 |                |      |                 |                                     |           |                                                   |           |                                                                                  |                                                                                                                                                                   |                                                                                                                                                                                                                                                                                                                                                  |
|--------|------|-------|-----------------|----------------|------|-----------------|-------------------------------------|-----------|---------------------------------------------------|-----------|----------------------------------------------------------------------------------|-------------------------------------------------------------------------------------------------------------------------------------------------------------------|--------------------------------------------------------------------------------------------------------------------------------------------------------------------------------------------------------------------------------------------------------------------------------------------------------------------------------------------------|
|        |      |       |                 |                |      |                 |                                     |           |                                                   |           | identify the new infarction                                                      | inflammatory diseases; Coexistence with hepatic diseases; Coexistence with renal diseases; Coexistence with tumor; missing data of bilirubin or other covariates. | density lipoprotein cholesterol (LDL-C)                                                                                                                                                                                                                                                                                                          |
| Xu, T. | 2013 | China | Cross-sectional | Hospital-based | 2361 | Stroke severity | After stroke: 24 hours of admission | TBIL DBIL | TBIL: 17.57±9.36 μmol/L<br>DBIL: 3.53±6.56 μmol/L | quartiles | confirmed by a computed tomography (CT) scan or magnetic resonance imaging (MRI) |                                                                                                                                                                   | age, sex, alcohol consumption, cigarette smoking, blood levels of glucose and lipids, admission SBP and DBP, blood urea nitrogen, serum creatinine, sodium, hematocrit, history of stroke, hypertension, diabetes, coronary heart disease, rheumatic heart disease, and atrial fibrillation, family history of stroke, hypertension and diabetes |

|              |      |       |              |                |     |                                       |                                     |                      |                                  |            |                                                                                                                                                                                                                                                                     |                                                                                                                                                                                                                                                    |                                                                    |
|--------------|------|-------|--------------|----------------|-----|---------------------------------------|-------------------------------------|----------------------|----------------------------------|------------|---------------------------------------------------------------------------------------------------------------------------------------------------------------------------------------------------------------------------------------------------------------------|----------------------------------------------------------------------------------------------------------------------------------------------------------------------------------------------------------------------------------------------------|--------------------------------------------------------------------|
| Ye Shan      | 2016 | China | Case-control | Hospital-based | 290 | Stroke severity                       | After stroke: 2 days of admission   | TBIL                 | TBIL: 14.968±6.613 μmol/L        | N/A        | Met the diagnostic criteria of the Chinese guidelines for the diagnosis and treatment of acute ischemic stroke 2010, had definite symptoms and signs of focal neurological deficits, and were confirmed by MRI; (2) Age > 18 years; (3) Visits within 72 h of onset | Transient ischemic attack (TIA), intracerebral hemorrhage, brain tumor, or brain trauma; Concomitant diseases including liver, biliary, pancreatic, renal diseases, neoplasms as well as drug-induced liver injury may affect bilirubin metabolism | N/A                                                                |
| Chen Guodong | 2016 | China | Case-control | Hospital-based | 108 | Stroke severity, Short term prognosis | After stroke: 24 hours of admission | TBIL<br>DBIL<br>IBIL | TBIL: 18.52±7.61 μmol/L<br>DBIL: | quartile 5 | They met the diagnostic criteria according to the 2010                                                                                                                                                                                                              | Liver function damage due to various causes, hemolytic jaundice, obstructive jaundice, hemorrhagic cerebral                                                                                                                                        | Type 2 diabetes mellitus, plasma glucose, systolic blood pressure, |

|          |      |       |              |                |    |                 |                                     |                      |                                                      |     |                                                                                                                                                                                                                                                                   |                                                                                                                                                                                                                                                                                                                                                                                                                                                                                   |                                           |
|----------|------|-------|--------------|----------------|----|-----------------|-------------------------------------|----------------------|------------------------------------------------------|-----|-------------------------------------------------------------------------------------------------------------------------------------------------------------------------------------------------------------------------------------------------------------------|-----------------------------------------------------------------------------------------------------------------------------------------------------------------------------------------------------------------------------------------------------------------------------------------------------------------------------------------------------------------------------------------------------------------------------------------------------------------------------------|-------------------------------------------|
|          |      |       |              |                |    | is              |                                     |                      | 3.82±1.32<br>μmol/L<br>IBIL:<br>14.43±5.23<br>μmol/L |     | guidelines for the diagnosis and treatment of acute ischemic stroke in China and were confirmed by cranial CT and / or MRI; Age ≥ 50 years;First occurrence of stroke, and a visit within 3 d of onset; Well established and detailed clinical data are available | infarction and other hemorrhagic diseases, infectious diseases, severe kidney disease, autoimmune diseases, malignancies, etc; Use of sulfonamides, bile acid lowering, choleretic drugs, salicylic acid and other drugs that affect bilirubin metabolism; With severe anemia. For the control group, contemporaneous health check ups with similar gender, age, and vascular risk factors were selected, and liver, biliary, renal, tumor, and hematologic history were excluded | low-density lipoprotein cholesterol level |
| Yan Wang | 2018 | China | Case-control | Hospital-based | 73 | Stroke severity | After stroke: on hospital admission | TBIL<br>DBIL<br>IBIL | TBIL:<br>25.62±12.33<br>μmol/L<br>DBIL:              | N/A | (a) patients met the diagnostic criteria for a cerebral                                                                                                                                                                                                           | patients with severe infection, tumors, hematological disorders, and autoimmune disease                                                                                                                                                                                                                                                                                                                                                                                           | N/A                                       |

---

8.72±5.  
15  
μmol/L  
IBIL:  
16.84±7  
.96  
μmol/L

infarction confirmed by clinical  
established by study, CT, or biochemical  
the Chinese tests that could result in a  
Medical nonatherosclerotic  
Association cerebrovascular disease;  
Neuropathy patients with auricular  
Academy and fibrillation, atrial flutter,  
TOAST heart-valve disease, and  
classification myocardial infarctions  
system; were within four weeks of the  
admitted to stroke which could lead  
the hospital to cardiogenic cerebral  
within 48 infarctions; patients with  
hours from the severe dysfunction of the  
onset of heart (arrhythmia, cardiac  
stroke; and failure, myocardial  
had not infarction, or  
received a myocarditis), liver  
treatment of (hepatocyte degeneration  
thrombolytic and necrosis, increased  
therapy glutamic-pyruvic  
transaminase, and  
bilirubin), and kidneys  
(blood urea nitrogen > 6.8  
mmol/L, serum  
creatinine > 159.1

---

|        |      |       |        |                |     |                 |                                     |              |                           |     |                                                     |                                                                                                                                                                                                                                                                                                                                                                                                                                                                                                                                       |                                                               |  |
|--------|------|-------|--------|----------------|-----|-----------------|-------------------------------------|--------------|---------------------------|-----|-----------------------------------------------------|---------------------------------------------------------------------------------------------------------------------------------------------------------------------------------------------------------------------------------------------------------------------------------------------------------------------------------------------------------------------------------------------------------------------------------------------------------------------------------------------------------------------------------------|---------------------------------------------------------------|--|
|        |      |       |        |                |     |                 |                                     |              |                           |     |                                                     | μmol/L, blood urea > 7.0 mmol/L); patients with central nervous system infections, which had inflammatory response, myelinoclasia or meningitis; patients with a history of perinatal strokes; patients being treated with thrombolytic therapy; patients with lesions detected by imaging examinations with an absence of clinical symptoms; patients who could not be examined with a head MRI due to a cardiac pacemaker, heart stent, middle ear implant, or metallic intraocular foreign body were all excluded from this study. |                                                               |  |
| Li, Z. | 2020 | China | Cohort | Hospital-based | 610 | Stroke severity | After stroke: on hospital admission | TBIL<br>DBIL | TBIL: 18.313±9.432 μmol/L | N/A | At admission, plain CT scan of the head was done to | N/A                                                                                                                                                                                                                                                                                                                                                                                                                                                                                                                                   | high density lipoprotein cholesterol, low density lipoprotein |  |

|  |                                    |                                                                                     |                                              |       |
|--|------------------------------------|-------------------------------------------------------------------------------------|----------------------------------------------|-------|
|  | DBIL:<br>4.706±2<br>.541<br>μmol/L | rule out<br>haemorrhage<br>and MRI was<br>done to<br>identify the<br>new infarction | cholesterol,<br>cholesterol,<br>triglyceride | Total |
|--|------------------------------------|-------------------------------------------------------------------------------------|----------------------------------------------|-------|

TBIL=total bilirubin; DBIL= Direct bilirubin; IBIL= Indirect bilirubin



**Table S5. Sensitivity analysis on the pooled ORs of ischemic stroke severity.**

| Study omitted    | OR   | 95% CI         |                |
|------------------|------|----------------|----------------|
|                  |      | Lower CI Limit | Upper CI Limit |
| Total bilirubin  |      |                |                |
| Li, Z. (2020)    | 1.13 | 1.09           | 1.18           |
| Li, Z. (2020)    | 1.16 | 1.10           | 1.23           |
| Luo, Y. (2012)   | 1.12 | 1.08           | 1.16           |
| Xu, T. (2013)    | 1.12 | 1.08           | 1.15           |
| Direct bilirubin |      |                |                |
| Li, Z. (2020)    | 1.10 | 1.06           | 1.14           |
| Li, Z. (2020)    | 1.09 | 1.05           | 1.14           |
| Luo, Y. (2012)   | 1.10 | 1.06           | 1.14           |
| Pineda, S (2008) | 1.71 | 1.58           | 1.85           |
| Xu, T. (2013)    | 1.09 | 1.05           | 1.13           |

**Table S6.** Differences in bilirubin levels between moderate and severe stroke patients on day 1 and 14 after admission.

| Study ID           | Day 1, Bilirubin (μmol/L) | Bilirubin (μmol/L) | WMD 95%CI                 |
|--------------------|---------------------------|--------------------|---------------------------|
| Total bilirubin    |                           |                    |                           |
| Chen Guodong       | 20.85±6.82                | 16.62±6.58         | 4.23(1.49-6.97)           |
| Yan Wang           | 36.1±2.8                  | 17.1±3.5           | 19.00(17.63-20.37)        |
| <b>Overall</b>     |                           |                    | <b>11.66(-2.81-26.14)</b> |
| Direct bilirubin   |                           |                    |                           |
| Chen Guodong       | 3.84±1.32                 | 3.35±1.25          | 0.49(-0.01-0.99)          |
| Yan Wang           | 12.8±3.5                  | 7.1±2.2            | 5.70(4.39-7.02)           |
| <b>Overall</b>     |                           |                    | <b>3.06(-2.05-8.16)</b>   |
| Indirect bilirubin |                           |                    |                           |
| Chen Guodong       | 16.28±4.52                | 12.56±4.96         | 3.72(1.78-5.66)           |
| Yan Wang           | 23.3±5.2                  | 8.7±3.1            | 13.30(11.31-15.29)        |
| <b>Overall</b>     |                           |                    | <b>8.51(-0.88-17.90 )</b> |
